# Supplementary material for: Wireless recording from unrestrained monkeys reveals motor goal encoding beyond immediate reach in frontoparietal cortex
Source: eLife. 2020 May 4;9:e51322. doi: 10.7554/eLife.51322 (PMC7228770; doi:10.7554/eLife.51322)
Supplement: Figure 5—source data 1. — One-tailed permutation test; ‘*” indicates Bonferroni corrected significance with p<0.0042. [file elife-51322-fig5-data1.xlsx]

## Sheet: Tabelle1
Monkey	Area	Period	Distance	Performance [%]	N units	P
K	M1	memory	near	59.75	60	0.062
K	M1	memory	far	58	60	0.072
K	M1	movement	near	87	60	< 0.001 *
K	M1	movement	far	54.5	60	0.2
K	PMd	memory	near	91.5	75	< 0.001 *
K	PMd	memory	far	82.25	75	< 0.001 *
K	PMd	movement	near	100	75	< 0.001 *
K	PMd	movement	far	83.5	75	< 0.001 *
K	PRR	memory	near	78.25	49	< 0.001 *
K	PRR	memory	far	71.25	49	< 0.001 *
K	PRR	movement	near	96	49	< 0.001 *
K	PRR	movement	far	85	49	< 0.001 *
L	M1	memory	near	79.6429	63	< 0.001 *
L	M1	memory	far	55.3571	63	0.122
L	M1	movement	near	97.8571	63	< 0.001 *
L	M1	movement	far	72.2321	63	< 0.001 *
L	PMd	memory	near	99.2857	67	< 0.001 *
L	PMd	memory	far	68.125	67	< 0.001 *
L	PMd	movement	near	99.2857	67	< 0.001 *
L	PMd	movement	far	80.0893	67	< 0.001 *
L	PRR	memory	near	93.5714	56	< 0.001 *
L	PRR	memory	far	83.0357	56	< 0.001 *
L	PRR	movement	near	98.5714	56	< 0.001 *
L	PRR	movement	far	88.125	56	< 0.001 *
