# Supplementary material for: Wireless recording from unrestrained monkeys reveals motor goal encoding beyond immediate reach in frontoparietal cortex
Source: eLife. 2020 May 4;9:e51322. doi: 10.7554/eLife.51322 (PMC7228770; doi:10.7554/eLife.51322)
Supplement: Figure 5—source data 2. — One-tailed permutation test; ‘*” indicates Bonferroni corrected significance with p<0.0042. [file elife-51322-fig5-data2.xlsx]

## Sheet: Tabelle1
Monkey	Area	Period	Distance	Firing rate modulation [Hz]	N units	P
K	M1	memory	near	1.15543	60	0.296
K	M1	memory	far	1.21577	60	0.041
K	M1	movement	near	3.09607	60	< 0.001 *
K	M1	movement	far	1.86291	60	< 0.001 *
K	PMd	memory	near	2.61741	75	< 0.001 *
K	PMd	memory	far	2.52115	75	< 0.001 *
K	PMd	movement	near	4.72656	75	< 0.001 *
K	PMd	movement	far	2.48721	75	< 0.001 *
K	PRR	memory	near	2.04944	49	< 0.001 *
K	PRR	memory	far	1.99129	49	< 0.001 *
K	PRR	movement	near	4.29463	49	< 0.001 *
K	PRR	movement	far	3.08071	49	< 0.001 *
L	M1	memory	near	1.64532	63	< 0.001 *
L	M1	memory	far	1.15812	63	0.013
L	M1	movement	near	6.04976	63	< 0.001 *
L	M1	movement	far	2.33533	63	< 0.001 *
L	PMd	memory	near	3.9609	67	< 0.001 *
L	PMd	memory	far	1.14605	67	0.001 *
L	PMd	movement	near	6.3391	67	< 0.001 *
L	PMd	movement	far	3.14422	67	< 0.001 *
L	PRR	memory	near	4.16214	56	< 0.001 *
L	PRR	memory	far	4.61263	56	< 0.001 *
L	PRR	movement	near	9.31247	56	< 0.001 *
L	PRR	movement	far	2.68415	56	< 0.001 *
