# Supplementary material for: Wireless recording from unrestrained monkeys reveals motor goal encoding beyond immediate reach in frontoparietal cortex
Source: eLife. 2020 May 4;9:e51322. doi: 10.7554/eLife.51322 (PMC7228770; doi:10.7554/eLife.51322)
Supplement: Figure 5—source data 3. — Two-tailed permutation test on SVM decoding accuracy differences between with and without passage; ‘*” indicates Bonferroni corrected significance with p<0.0083. [file elife-51322-fig5-data3.xlsx]

## Sheet: Tabelle1
Monkey	Area	Period	Absolute difference [% points]	N channel	P
K	M1	memory	3.39286	64	0.664
K	M1	movement	22.8571	64	0.024
K	PMd	memory	7.85714	64	0.404
K	PMd	movement	15.3571	64	0.14
K	PRR	memory	0.357143	64	0.944
K	PRR	movement	8.03571	64	0.304
L	M1	memory	1.42857	64	0.928
L	M1	movement	1.78571	64	0.852
L	PMd	memory	5.83333	64	0.792
L	PMd	movement	2.14286	64	0.788
L	PRR	memory	8.57143	64	0.572
L	PRR	movement	2.14286	64	0.82
