# Supplementary material for: Wireless recording from unrestrained monkeys reveals motor goal encoding beyond immediate reach in frontoparietal cortex
Source: eLife. 2020 May 4;9:e51322. doi: 10.7554/eLife.51322 (PMC7228770; doi:10.7554/eLife.51322)
Supplement: Figure 5—source data 4. — Two-tailed permutation test; ‘*” indicates Bonferroni corrected significance with p<0.0083. [file elife-51322-fig5-data4.xlsx]

## Sheet: Tabelle1
Monkey	Area	Period	Firing rate modulation difference [Hz]	N channel	P
K	M1	memory	-1.1724	64	0.354
K	M1	movement	0.398559	64	0.214
K	PMd	memory	0.0140039	64	0.916
K	PMd	movement	0.422349	64	0.37
K	PRR	memory	-0.666153	64	0.636
K	PRR	movement	1.43706	64	0.032
L	M1	memory	1.55832	64	0.37
L	M1	movement	1.76658	64	0.186
L	PMd	memory	0.841094	64	0.756
L	PMd	movement	2.47084	64	0.268
L	PRR	memory	-0.803512	64	0.338
L	PRR	movement	-0.0234466	64	0.38
